# Supplementary material for: In Situ Detection of Salmonid Alphavirus 3 (SAV3) in Tissues of Atlantic Salmon in a Cohabitation Challenge Model with a Special Focus on the Immune Response to the Virus in the Pseudobranch
Source: MDPI journal article supplement (doi:10.3390/v15122450), 2023-12-15
Supplement: s1 [file s1]

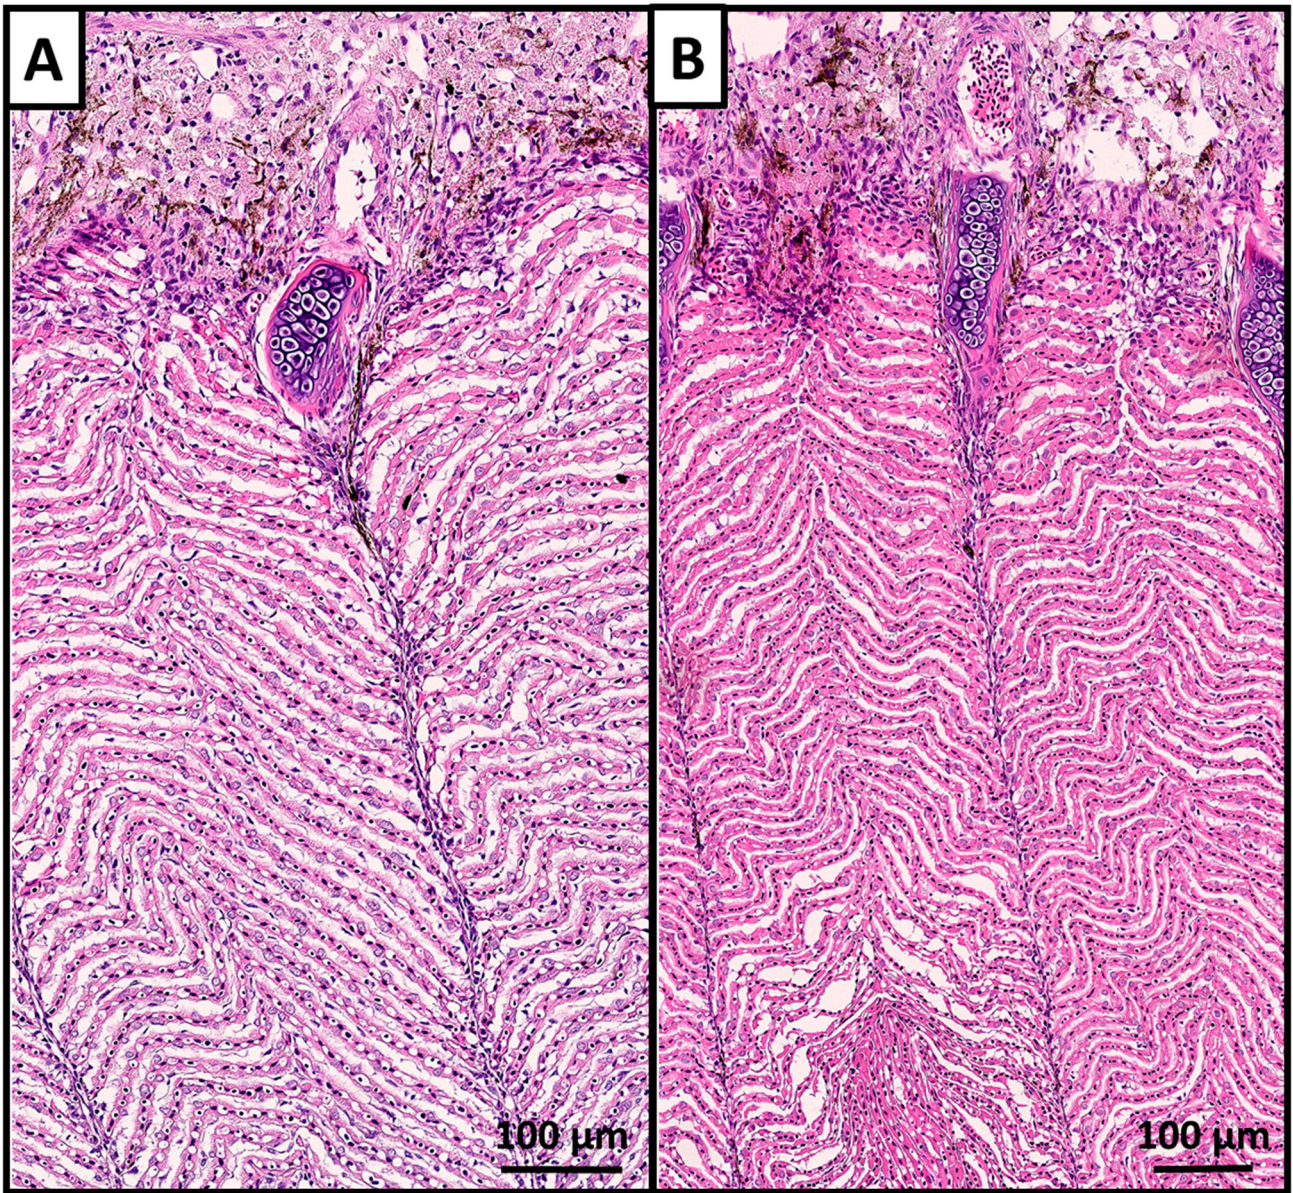

**Supplementary figure 1.** Histopathological analysis of the pseudobranch tissues in Atlantic salmon following SAV3 challenge (by cohabitation) at 16 dpc showing no histological difference between (A) Control fish (non infected) and (B) SAV3-infected fish from HD group at 16 dpc.
